# Supplementary figures and images for: Level of Mental Health Intervention and Clinical Need Among Inmates With Mental Illness in Five English Jails
Source: Atypon-hosted journal article supplement (doi:10.1176/appi.ps.201100344), 2012-12-01

Figure 1: Sampling flowchart

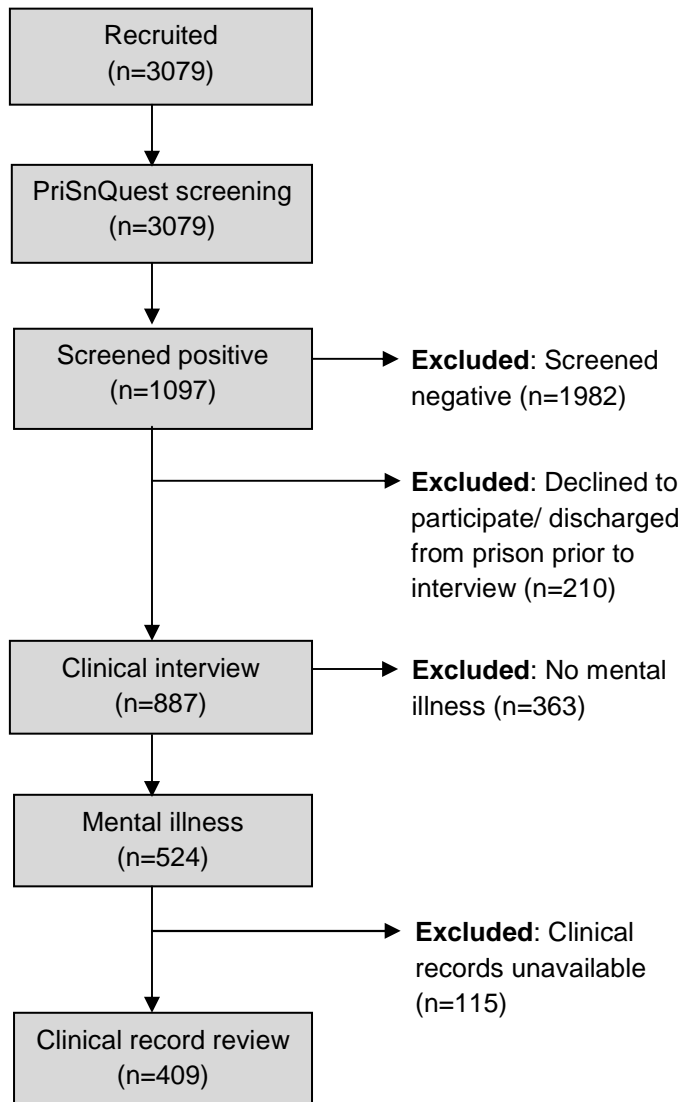

Supplement: 1218_ds001.pdf [file 1218_ds001.pdf]
